# Supplementary material for: Divisive hierarchical maximum likelihood clustering
Source: PubMed Central journal article supplement (PMC5751574; doi:10.1186/s12859-017-1965-5), 2017-12-28
Supplement: 12859_2017_1965_MOESM1_ESM.pdf [file 12859_2017_1965_MOESM1_ESM.pdf]

# Supplement 1:

Divisive hierarchical maximum likelihood  
clustering

# Illustration using 4 cluster case

Synthetic data topology

Description in 2D-plane

4 cluster case

Determine location (mean  $\mu$ )

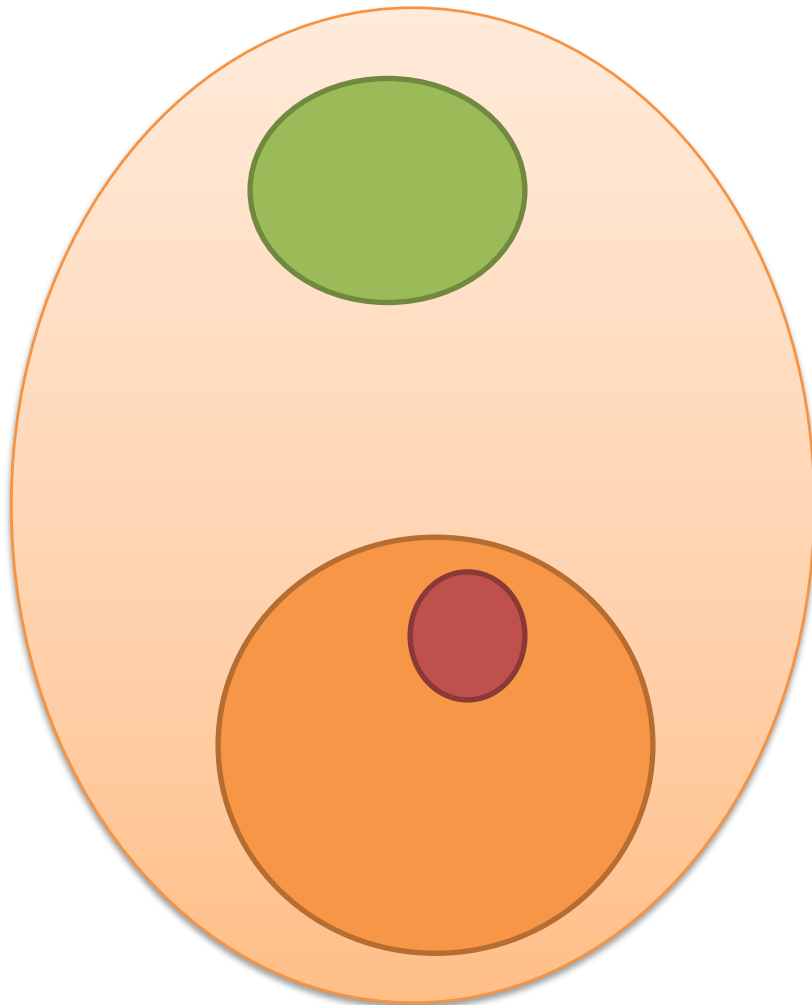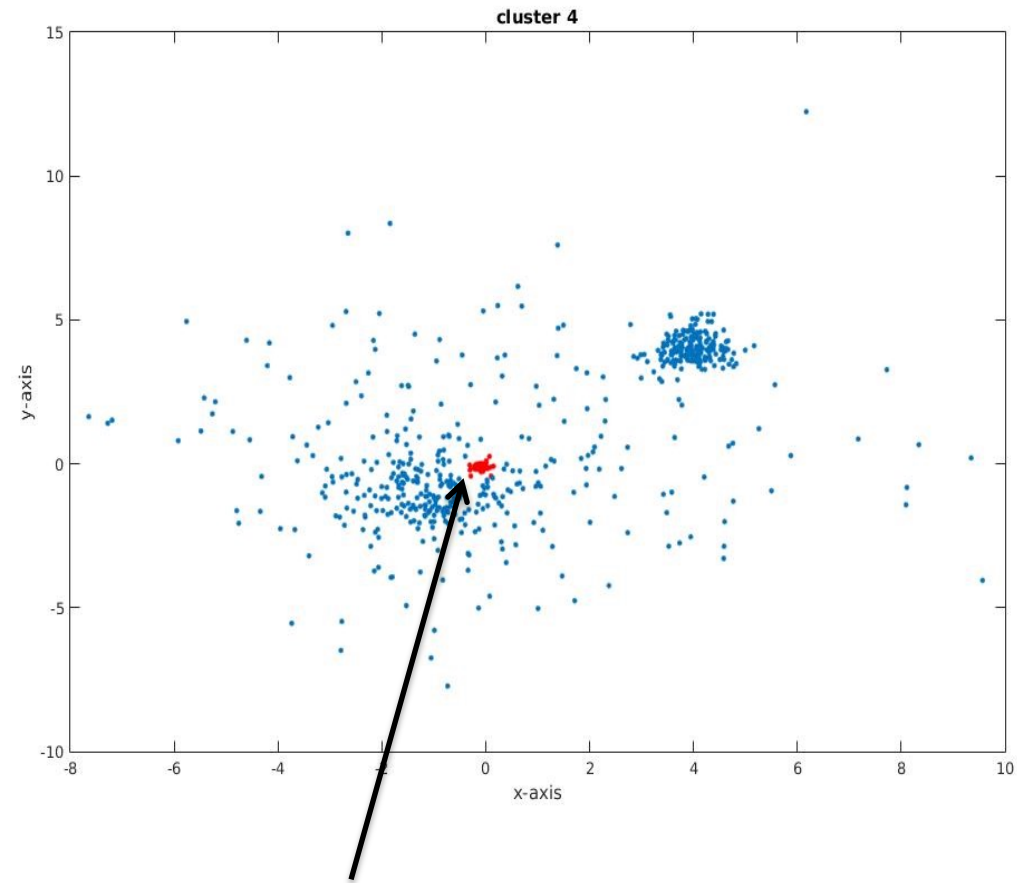

Fig. S1a

Fig. S1b

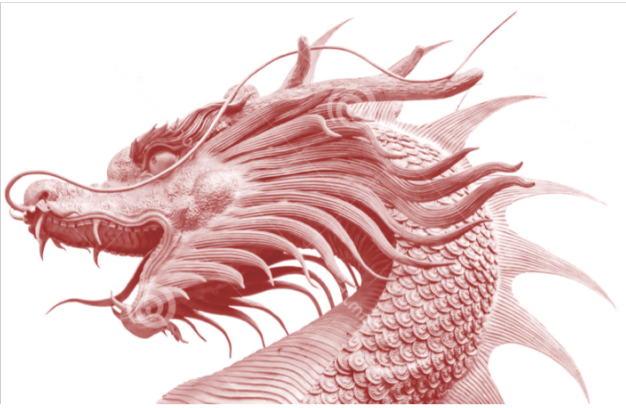

## Dragon method: an illustration

- Two steps
  1. Finding location.
  2. Tuning cluster.

# STEP 1: Finding Location

Take out only 1 sample at a time such that Likelihood is increased

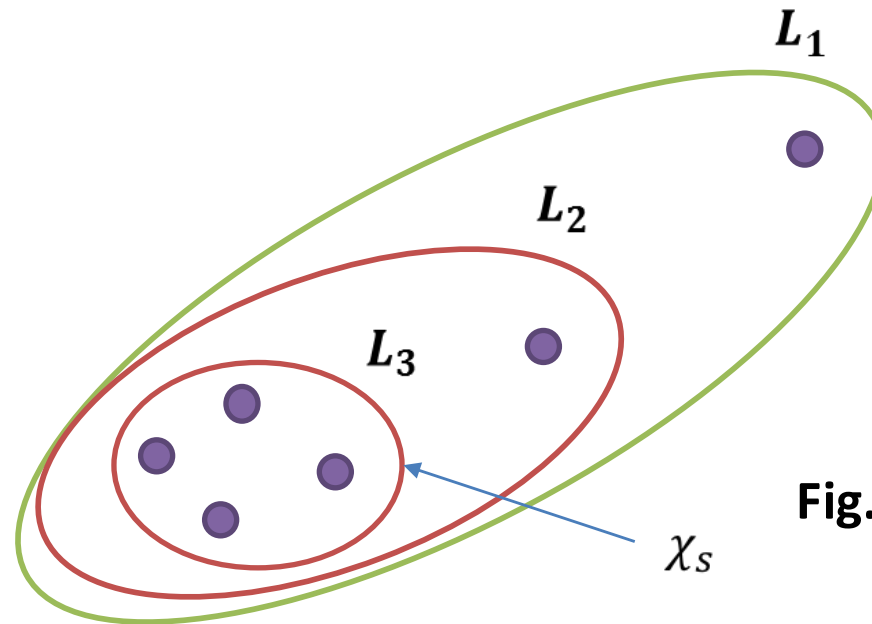

Fig. S2

Maximize distance  $P$

$$\hat{x} = \arg \max_{x \in \mathcal{X}} P \quad (1)$$

$$\text{where } P = (x - \mu)^T \Sigma^{-1} (x - \mu) \quad (2)$$

Remove  $\hat{x} \in \mathcal{X}$  such that  $L^* > L$  (i.e., new  $L >$  old  $L$ )

This procedure gives a cluster  $\chi_s$

## ***Step 2: Tuning cluster***

- From the mean of  $\chi_S$ , find distance (or dot product) to all the samples.
- Perform k-means in this inner product space.

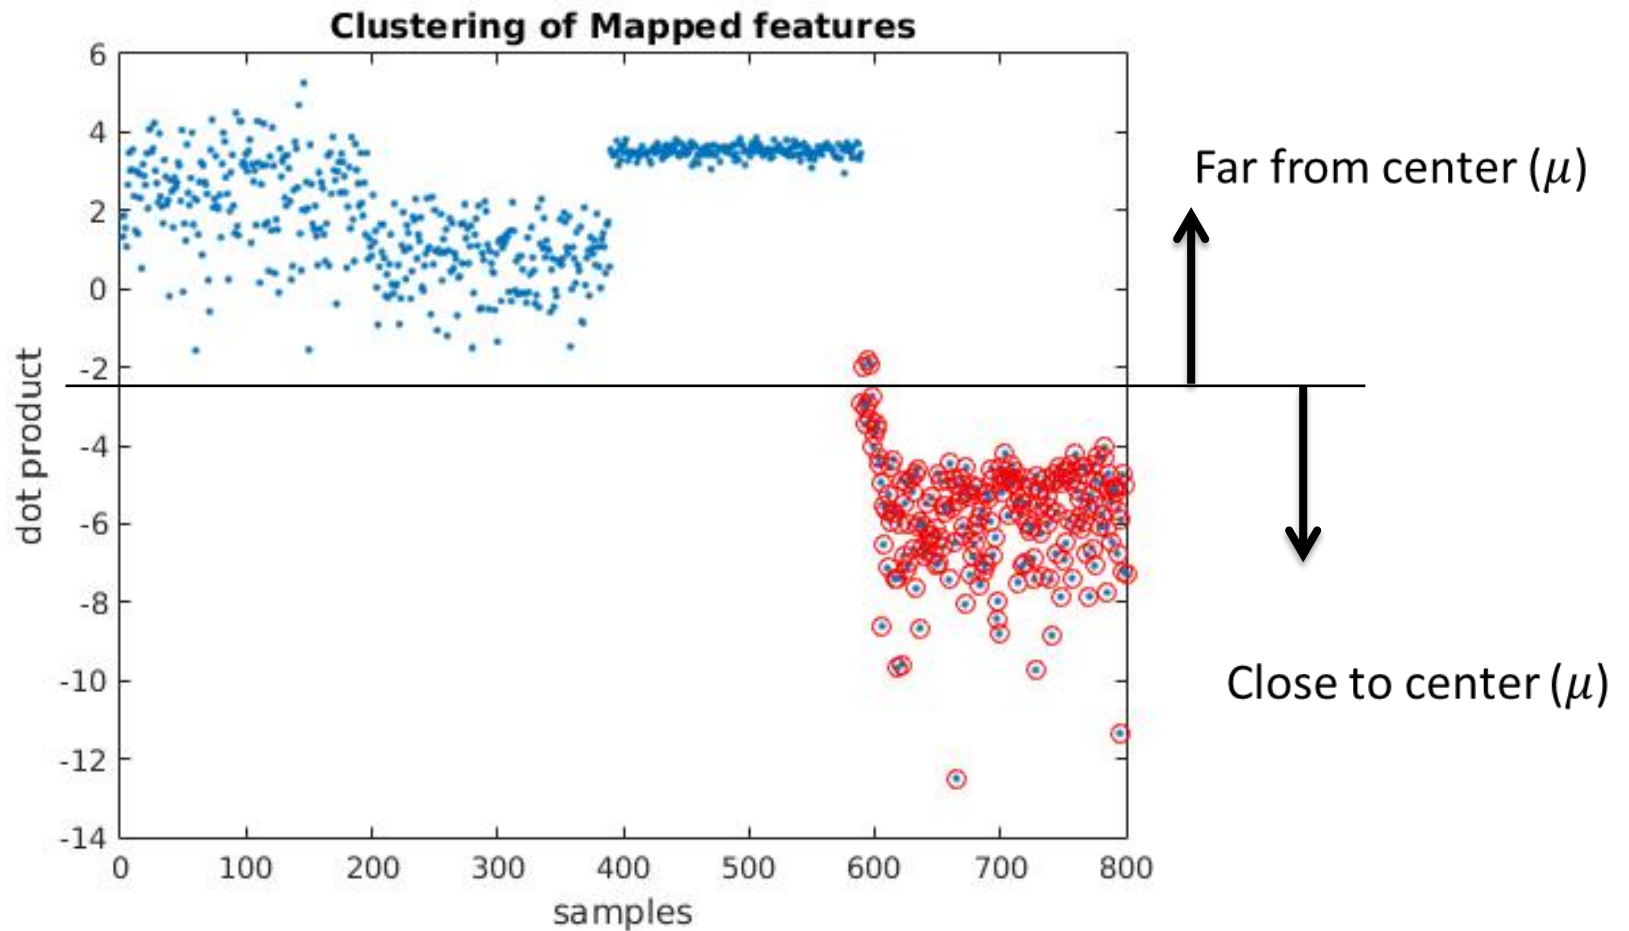

**Fig. S3**

- Conducting the same 2-step procedure to all the remaining clusters one-by-one (assuming 4-clusters), we get Fig. S4.

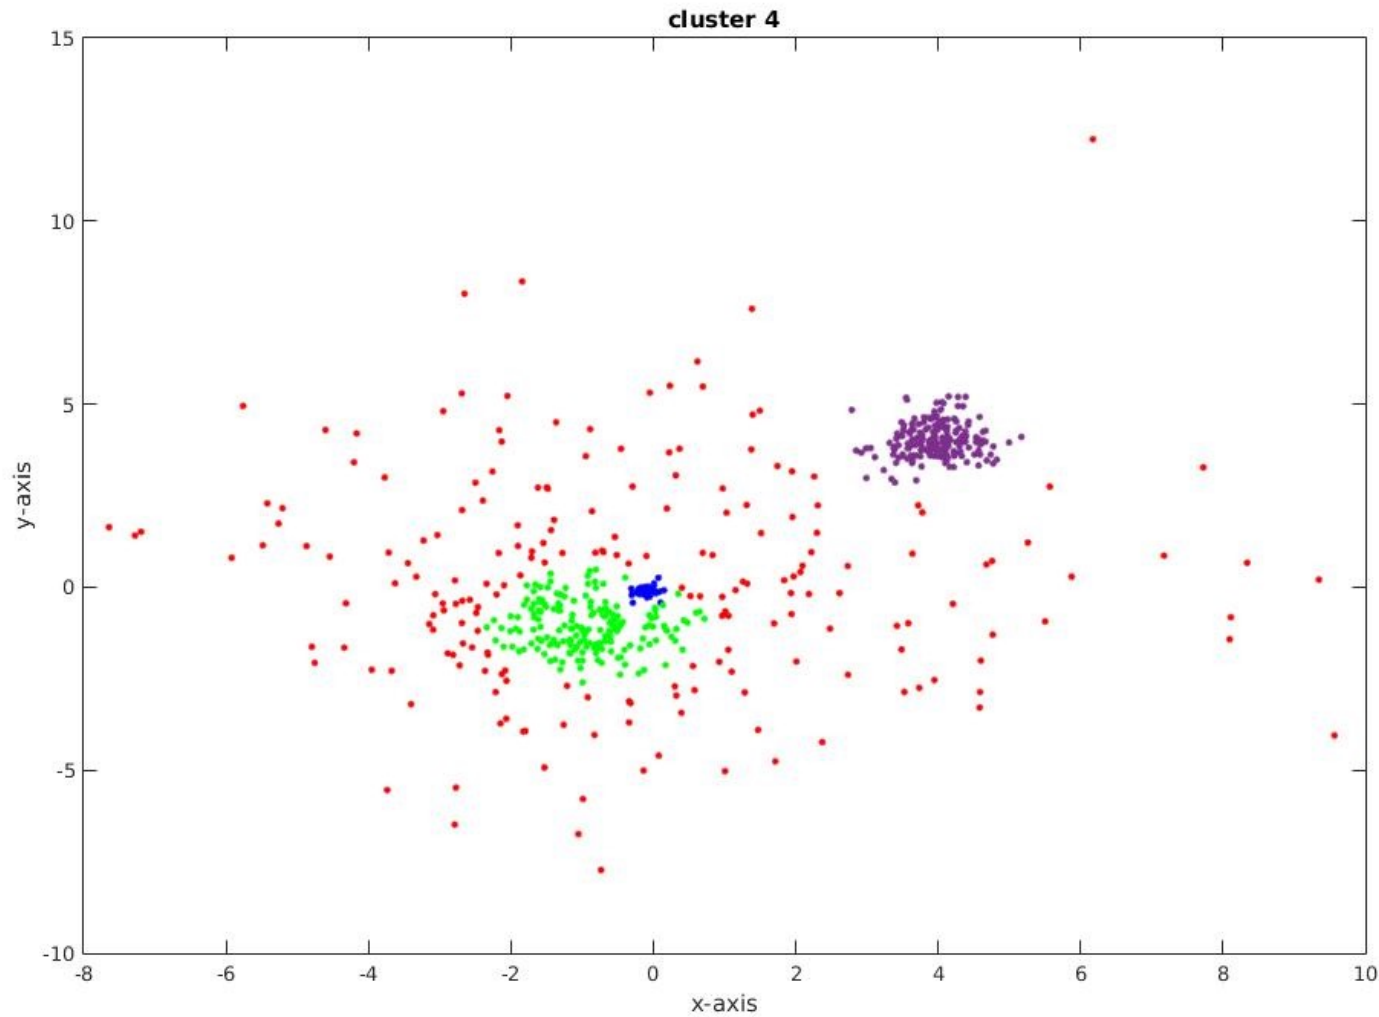

**Fig. S4**

# Ltot and $\delta L_{tot}$ plots

(to identify number of clusters)

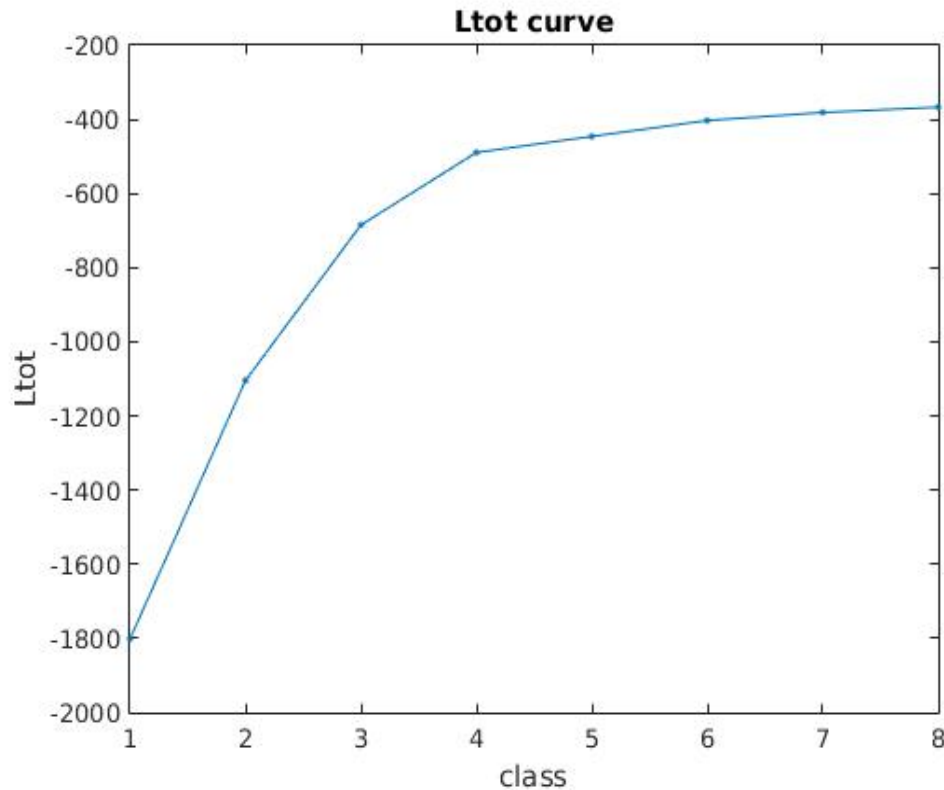

Fig. S5a

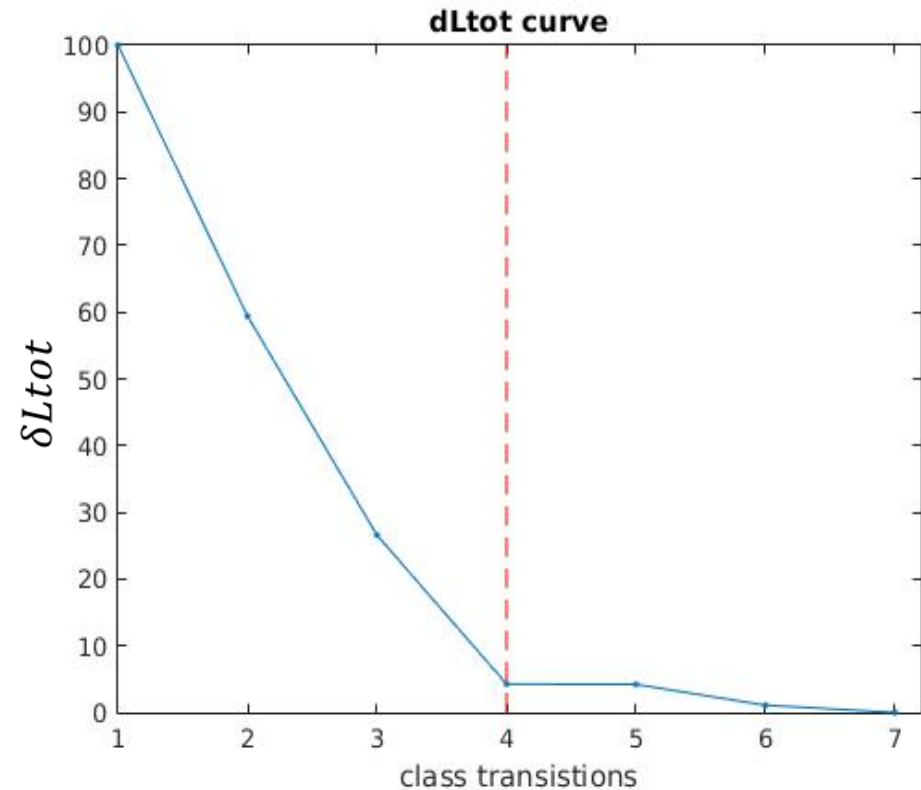

Fig. S5b

Computation of  $\delta L_{tot}$  curve

$$\delta L_{tot} \leftarrow \text{diff}(L_{tot})$$

$$\delta L_{tot} \leftarrow \delta L_{tot} - \min(\delta L_{tot})$$

$$\delta L_{tot} \leftarrow \frac{\delta L_{tot}}{\max(\delta L_{tot})} \text{ (to have a ranged between [0,1] or [0,100] if mult. By 100)}$$

# Synthetic data: Flame

Flame data was provided by Fu and Medico, 2007

Table S1.1

| <b>Methods</b>                 | <b>Rand Score</b> |
|--------------------------------|-------------------|
| SLINK                          | 0.54              |
| CLINK                          | 0.50              |
| ALINK                          | 0.72              |
| Wa-LINK                        | 0.60              |
| Wt-LINK                        | 0.70              |
| MLINK                          | 0.68              |
| SLINK (Div)                    | 0.54              |
| CLINK (Div)                    | 0.50              |
| ALINK (Div)                    | 0.54              |
| Dunn's original (Div)          | 0.54              |
| Dunn's variant (Div)           | 0.50              |
| Macnaughton-Smith et al. (Div) | 0.51              |
| Principal Direction (Div)      | 0.56              |
| Kmeans                         | 0.73              |
| DRAGON                         | 0.95              |

Flame: N=240, nClusters=2, nDimensions=2: L. Fu and E. Medico, FLAME, a novel fuzzy clustering method for the analysis of DNA microarray data. *BMC bioinformatics*, 2007. 8(1): p. 3.



# Synthetic data: Pathbased

Pathbased data was provided by Chang and Yeung, 2008

Table S1.2

| <b>Methods</b>                 | <b>Rand Score</b> |
|--------------------------------|-------------------|
| SLINK                          | 0.34              |
| CLINK                          | 0.69              |
| ALINK                          | 0.74              |
| Wa-LINK                        | 0.76              |
| Wt-LINK                        | 0.71              |
| MLINK                          | 0.75              |
| SLINK (Div)                    | 0.34              |
| CLINK (Div)                    | 0.63              |
| ALINK (Div)                    | 0.73              |
| Dunn's original (Div)          | 0.72              |
| Dunn's variant (Div)           | 0.70              |
| Macnaughton-Smith et al. (Div) | 0.72              |
| Principal Direction (Div)      | 0.68              |
| Kmeans                         | 0.75              |
| DRAGON                         | 0.93              |

Pathbased: N=300, nClusters=3, nDimensions=2: H. Chang and D.Y. Yeung, Robust path-based spectral clustering. *Pattern Recognition*, 2008. 41(1): p. 191-203.

# Synthetic data: Aggregation

Aggregation data was provided by Gionis et al., 2007

Table S1.3

| <b>Methods</b>                 | <b>Rand Score</b> |
|--------------------------------|-------------------|
| SLINK                          | 0.93              |
| CLINK                          | 0.93              |
| ALINK                          | 1.00              |
| Wa-LINK                        | 0.94              |
| Wt-LINK                        | 0.92              |
| MLINK                          | 0.98              |
| SLINK (Div)                    | 0.75              |
| CLINK (Div)                    | -                 |
| ALINK (Div)                    | 0.72              |
| Dunn's original (Div)          | 0.77              |
| Dunn's variant (Div)           | 0.77              |
| Macnaughton-Smith et al. (Div) | 0.83              |
| Principal Direction (Div)      | 0.84              |
| Kmeans                         | 0.92              |
| DRAGON                         | 0.98              |

Pathbased: N=788, nClusters=7, nDimensions=2: A. Gionis, H. Mannila, and P. Tsaparas, Clustering aggregation. *ACM Transactions on Knowledge Discovery from Data (TKDD)*, 2007. 1(1): p. 1-30.
