# Supplementary material for: Divisive hierarchical maximum likelihood clustering
Source: PubMed Central journal article supplement (PMC5751574; doi:10.1186/s12859-017-1965-5), 2017-12-28
Supplement: 12859_2017_1965_MOESM2_ESM.pdf [file 12859_2017_1965_MOESM2_ESM.pdf]

# Supplement 2

## Computational consideration of DRAGON search

Let  $n$  be the total number of samples in a sample set  $\chi$ , and  $n_i$  be the number of samples in  $i$ th cluster ( $\chi_i$ ). By taking one sample out at a time would induce the following computational requirements for dragon search:

| $k$ -th sample taken out         | Remaining number of samples after<br>$k$ -th sample was taken out | Search requirements |
|----------------------------------|-------------------------------------------------------------------|---------------------|
| 1 <sup>st</sup> sample taken out | $n - 1$                                                           | $n$                 |
| 2 <sup>nd</sup> sample taken out | $n - 2$                                                           | $n - 1$             |
| $\vdots$                         | $\vdots$                                                          | $\vdots$            |
| $\vdots$                         | $\vdots$                                                          | $\vdots$            |
| $n - n_1$ sample taken out       | $n - (n - n_1)$                                                   | $n - (n - n_1 - 1)$ |

The above search would find the first cluster with  $n_1$  samples. It can be noted (from column 3 of the table) that  $n$  is appeared  $n - n_1$  times (along the row). Therefore, the total search to obtain the first cluster would be the summation of column 3; i.e.,

$$\begin{aligned}
 T_1 &= n(n - n_1) - \frac{1}{2}(n - n_1 - 1)(n - n_1) \\
 &= \frac{1}{2}(n - n_1)(n + n_1 + 1) \\
 &= \frac{1}{2}\left(n + \frac{1}{2}\right)^2 - \frac{1}{2}\left(n_1 + \frac{1}{2}\right)^2
 \end{aligned}$$

assuming  $n + \frac{1}{2} \approx n$  and  $n_1 + \frac{1}{2} \approx n_1$ , we get

$$T_1 \approx \frac{1}{2}n^2 - \frac{1}{2}n_1^2 \quad (S1)$$

After locating cluster 1,  $n_1$  samples of cluster 1 will be removed from the sample set  $\chi$ . This would reduce the total number of samples to  $n - n_1$ . Therefore, for the 2<sup>nd</sup> cluster the search can be obtained by simply replacing  $n$  by  $n - n_1$ , and,  $n_1$  by  $n_2$  in Equation S1, where  $n_2$  is the number of samples in cluster 2. This would give total search for the 2<sup>nd</sup> cluster as

$$T_2 \approx \frac{1}{2}(n - n_1)^2 - \frac{1}{2}n_2^2 \quad (S2)$$

Similarly, the search for  $k$ -th cluster can be given obtained as

$$T_k \approx \frac{1}{2}(n - n_1 - n_2 \dots - n_{k-1})^2 - \frac{1}{2}n_k^2 \quad (S3)$$

If there are  $c$  clusters then the total search would be:

$$T_{tot} \approx \frac{1}{2}\sum_{i=1}^{c-1}(n - n_1 - n_2 \dots n_{i-1})^2 - \frac{1}{2}\sum_{i=1}^{c-1}n_i^2 \quad (S4)$$

Note that in Equation S4, the upper limit of summation is  $c - 1$  and not  $c$  because if there are only two clusters required to be found then only  $T_1$  search is required. In other words, the 1<sup>st</sup> cluster ( $\chi_1$ ) can be

obtained by removing a sample at a time from sample set  $\chi$  (this would require  $T_1$  search), and, the remaining samples can be collected to form the second cluster (this would require no search). Similarly, if there are  $c$  clusters to be found then  $T_1 + T_2 + \dots + T_{c-1}$  search is required. Equation S4 can be simplified as

$$T_{tot} \approx \frac{1}{2} \sum_{i=1}^{c-1} (n - \sum_{j=1}^{i-1} n_j)^2 - \frac{1}{2} \sum_{i=1}^{c-1} n_i^2 \quad (S5)$$

Two cases can be considered to further simplify Equation S5: 1) If all clusters have equal number of samples; i.e.,  $n_1 = n_2 = \dots = n_{c-1} = n_c = n/c$ ; and, 2) if the number of clusters is same as the number of samples ( $n = c$ ); i.e., each cluster would have 1 sample each or  $n_i = 1$ .

Case 1: if  $n_i = n/c$  for  $i = 1, 2, \dots, c$  then from Equation S5

$$\begin{aligned} T_{tot} &\approx \frac{1}{2} \sum_{i=1}^{c-1} \left( n - \frac{n}{c} (i-1) \right)^2 - \frac{1}{2} \frac{n^2}{c^2} (c-1) \\ &= \frac{1}{2} \frac{n^2}{c^2} \sum_{i=1}^{c-1} (c - (i-1))^2 - \frac{1}{2} \frac{n^2}{c^2} (c-1) \end{aligned}$$

substituting  $i \leftarrow c - (i-1)$ , we get

$$= \frac{1}{2} \frac{n^2}{c^2} \sum_{i=2}^c i^2 - \frac{1}{2} \frac{n^2}{c^2} (c-1)$$

from the sum of the squares of the first  $c$  natural numbers we get

$$= \frac{1}{2} \frac{n^2}{c^2} \left( \frac{c^3}{3} + \frac{c^2}{2} + \frac{c}{6} - 1 \right) - \frac{1}{2} \frac{n^2}{c^2} (c-1)$$

assuming  $c-1 \approx c$  and  $c^3 \gg c^2 \gg c$ , we get

$$T_{tot} \approx \frac{1}{6} n^2 c - \frac{1}{2} \frac{n^2}{c} = O(n^2 c)$$

Case 2: If  $n_i = 1$  for  $i = 1, 2, \dots, n$  (as  $n = c$ ) then from Equation S5

$$\begin{aligned} T_{tot} &\approx \frac{1}{2} \sum_{i=1}^{n-1} (n - \sum_{j=1}^{i-1} n_j)^2 - \frac{1}{2} \sum_{i=1}^{n-1} n_i^2 \\ &= \frac{1}{2} \sum_{i=1}^{n-1} (n - (i-1))^2 - \frac{1}{2} (n-1) \end{aligned}$$

substituting  $i \leftarrow n - (i-1)$ , we get

$$\begin{aligned} &= \frac{1}{2} \sum_{i=2}^n i^2 - \frac{1}{2} (n-1) \\ &= \frac{1}{2} \left( \frac{n^3}{3} + \frac{n^2}{2} + \frac{n}{6} - 1 \right) - \frac{1}{2} (n-1) \end{aligned}$$

assuming  $n^3 \gg n^2 \gg n$ , we get

$$T_{tot} \approx \frac{1}{6} n^3 = O(n^3)$$

Therefore, the search complexity is between  $O(n^2 c)$  and  $O(n^3)$ .
