# Supplementary material for: Divisive hierarchical maximum likelihood clustering
Source: PubMed Central journal article supplement (PMC5751574; doi:10.1186/s12859-017-1965-5), 2017-12-28
Supplement: 12859_2017_1965_MOESM3_ESM.pdf [file 12859_2017_1965_MOESM3_ESM.pdf]

# Supplement 3

## Clustering accuracy using InfoGain feature selection method

This supplement reports the clustering accuracy of various methods on ALL, MLL and Mutation datasets. The genes from the datasets were pre-selected using InfoGain ranking scheme. The top  $r$  genes were used in this process, where  $r = 2,3,4$  and 5. The results are shown in Tables S3.1, S3.2 and S3.3. It can be observed that DRAGON is giving competitive results on all the three datasets using InfoGain.

**Table S3.1:** Clustering accuracy (%) on acute leukemia dataset.

| Methods                        | Dim 2 | Dim 3 | Dim 4 | Dim 5 |
|--------------------------------|-------|-------|-------|-------|
| SLINK                          | 65.3  | 63.9  | 66.7  | 81.9  |
| CLINK                          | 75.0  | 70.8  | 81.9  | 81.9  |
| ALINK                          | 65.3  | 73.6  | 84.7  | 81.9  |
| Wa-LINK                        | 93.1  | 93.1  | 81.9  | 81.9  |
| Wt-LINK                        | 90.3  | 88.9  | 81.9  | 72.2  |
| MLINK                          | 90.3  | 91.7  | 81.9  | 81.9  |
| SLINK (Div)                    | 65.3  | 66.7  | 66.7  | 81.9  |
| CLINK (Div)                    | 77.8  | 84.7  | 80.6  | 80.6  |
| ALINK (Div)                    | 66.7  | 66.7  | 66.7  | 66.7  |
| Dunn's original (Div)          | 66.7  | 77.8  | 80.6  | 75.0  |
| Dunn's variant (Div)           | 65.3  | 72.2  | 70.8  | 70.8  |
| Macnaughton-Smith et al. (Div) | 90.3  | 84.7  | 81.9  | 81.9  |
| Principal Direction (Div)      | 91.7  | 93.1  | 88.9  | 88.9  |
| DRAGON                         | 94.4  | 91.7  | 97.1  | 94.0  |

**Table S3.2:** Clustering accuracy (%) on MLL dataset.

| Methods                        | Dim 2 | Dim 3 | Dim 4 | Dim 5 |
|--------------------------------|-------|-------|-------|-------|
| SLINK                          | 40.3  | 40.3  | 43.1  | 43.1  |
| CLINK                          | 45.8  | 50.0  | 54.2  | 73.6  |
| ALINK                          | 50.0  | 50.0  | 50.0  | 43.1  |
| Wa-LINK                        | 62.5  | 62.5  | 62.5  | 61.1  |
| Wt-LINK                        | 45.8  | 50.0  | 43.1  | 43.1  |
| MLINK                          | 45.8  | 50.0  | 43.1  | 43.1  |
| SLINK (Div)                    | 41.7  | 41.7  | 43.1  | 43.1  |
| CLINK (Div)                    | 54.2  | 45.8  | 56.9  | 63.8  |
| ALINK (Div)                    | 41.7  | 41.7  | 43.1  | 43.1  |
| Dunn's original (Div)          | 44.4  | 44.4  | 45.8  | 44.4  |
| Dunn's variant (Div)           | 41.7  | 41.7  | 43.1  | 43.1  |
| Macnaughton-Smith et al. (Div) | 54.2  | 48.6  | 50.0  | 52.8  |
| Principal Direction (Div)      | 62.5  | 62.5  | 62.5  | 59.7  |
| DRAGON                         | 68.8  | 62.8  | 62.0  | 61.0  |

**Table S3.3:** Clustering accuracy (%) on mutation dataset.

| <b>Methods</b>                 | <b>Dim 2</b> | <b>Dim 3</b> | <b>Dim 4</b> | <b>Dim 5</b> |
|--------------------------------|--------------|--------------|--------------|--------------|
| SLINK                          | 77.9         | 77.9         | 82.0         | 77.9         |
| CLINK                          | 77.3         | 82.0         | 70.6         | 77.7         |
| ALINK                          | 77.3         | 77.3         | 75.5         | 75.5         |
| Wa-LINK                        | 77.3         | 77.7         | 51.6         | 51.0         |
| Wt-LINK                        | 77.3         | 82.0         | 70.6         | 77.3         |
| MLINK                          | 54.6         | 54.6         | 77.9         | 75.5         |
| SLINK (Div)                    | 54.5         | 54.5         | 54.5         | 54.5         |
| CLINK (Div)                    | 54.5         | 54.5         | 54.5         | 54.5         |
| ALINK (Div)                    | 77.9         | 82.6         | 82.6         | 81.1         |
| Dunn's original (Div)          | 77.9         | 83.0         | 82.6         | 76.3         |
| Dunn's variant (Div)           | 54.5         | 54.5         | 54.5         | 54.5         |
| Macnaughton-Smith et al. (Div) | 77.9         | 83.0         | 83.0         | 76.7         |
| Principal Direction (Div)      | 54.5         | 54.5         | 51.0         | 51.6         |
| DRAGON                         | 77.9         | 82.2         | 82.2         | 82.2         |
